# Supplementary material for: Effectiveness of a Lifestyle Change Program on Insulin Resistance in Yaquis Indigenous Populations in Sonora, Mexico: PREVISY
Source: MDPI journal article supplement (doi:10.3390/nu15030597), 2023-01-23
Supplement: s1 [file s1]

Supplementary Material

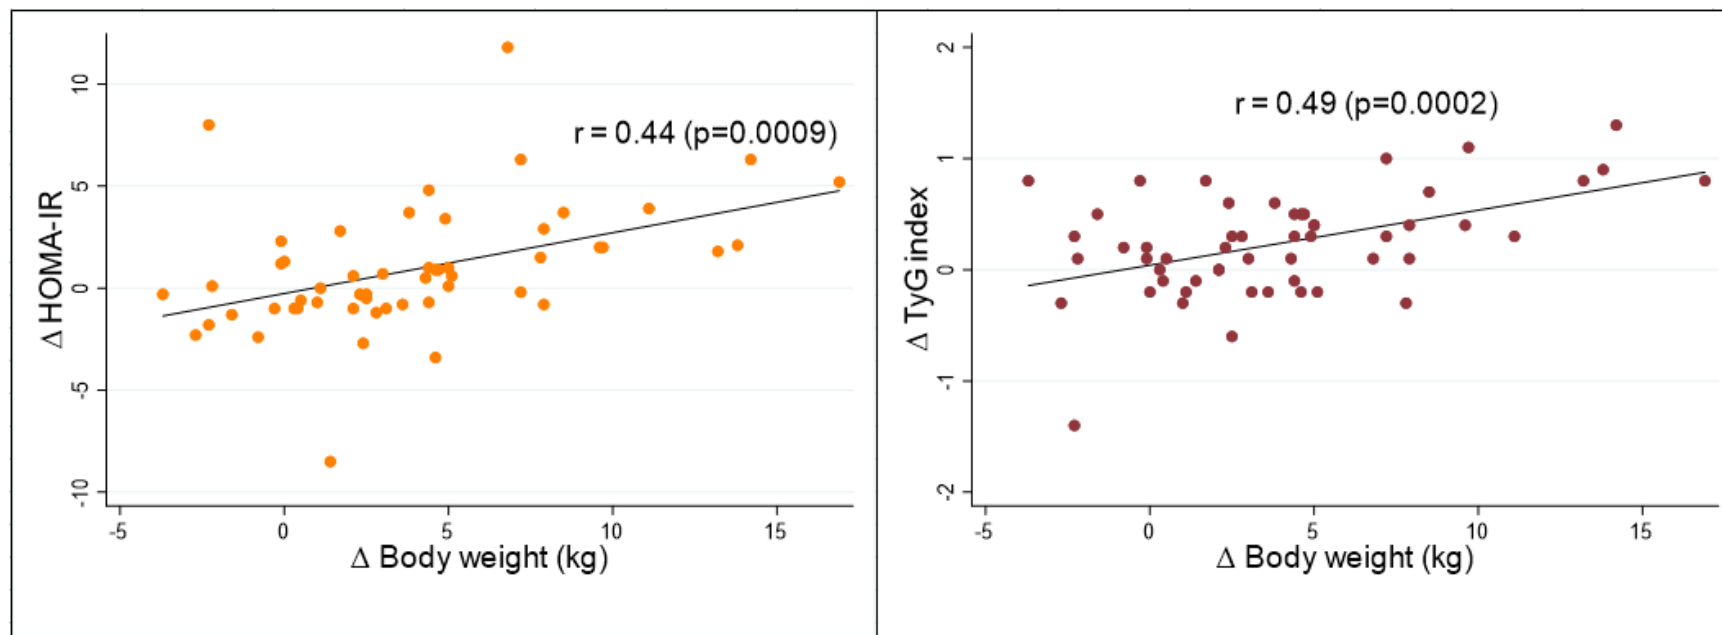

**Figure S1.** Correlation between the change in body weight and the changes in insulin resistance indicators in the completer subjects in the short term. HOMA-IR: Homeostasis Model Assessment of Insulin Resistance; TyG index: Triglycerides-Glucose Index.

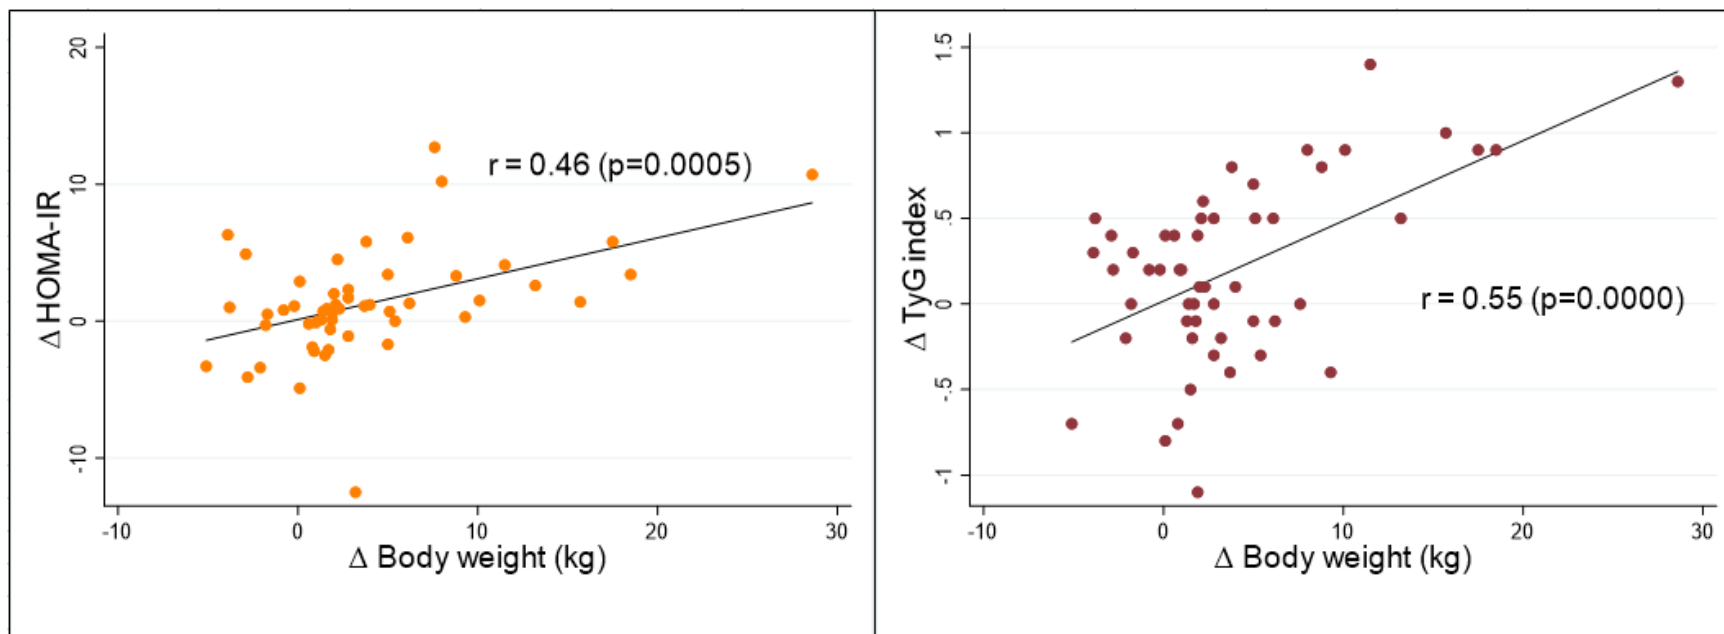

**Figure S2.** Correlation between the change in body weight and the changes in insulin resistance indicators in the completer subjects in the medium term. HOMA-IR: Homeostasis Model Assessment of Insulin Resistance; TyG index: Triglycerides-Glucose Index.
